# Supplementary material
Source: PubMed Central journal article supplement (PMC5736309)
Supplement: NIHMS925853-supplement-1.pdf [file NIHMS925853-supplement-1.pdf]

Figure S1

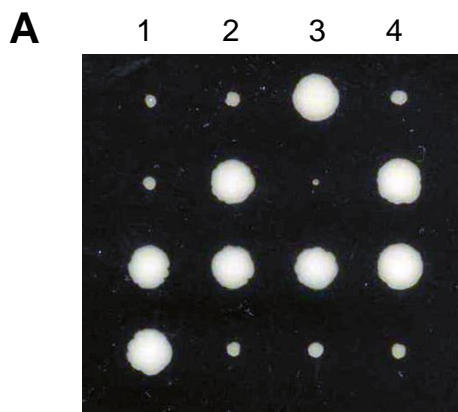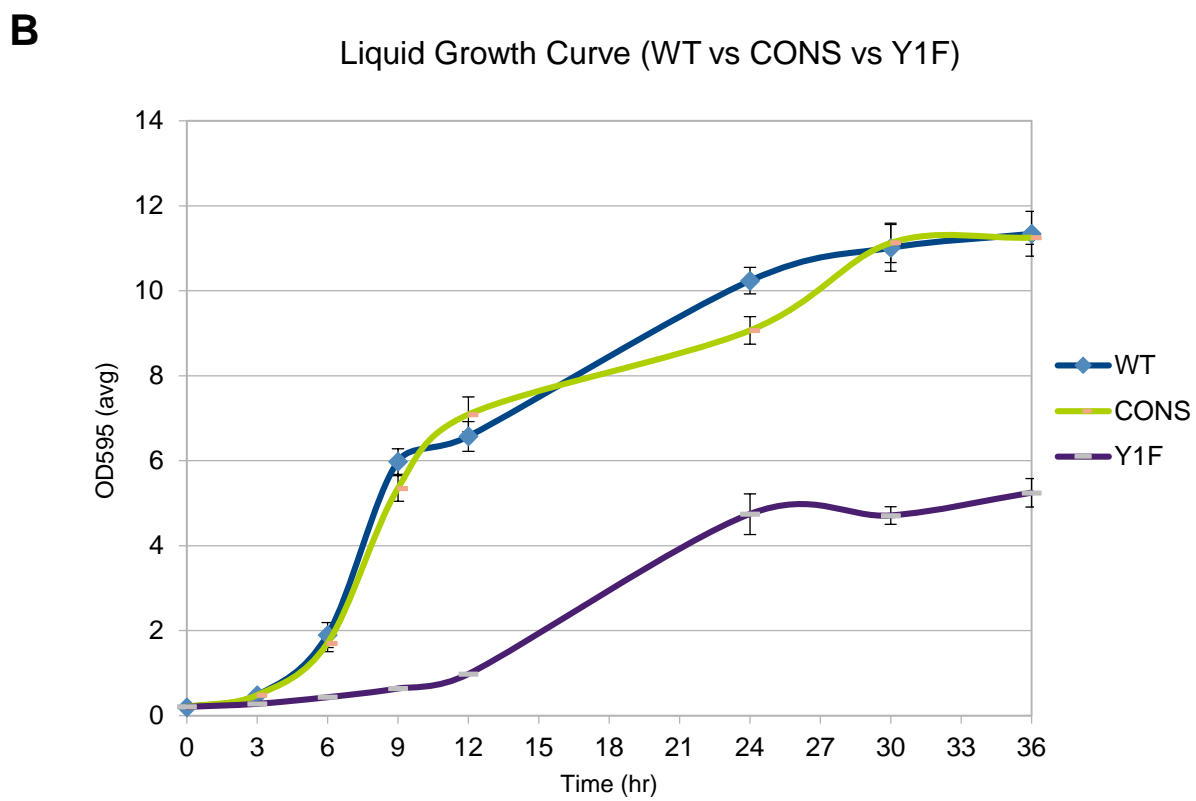

Figure S2

**A**

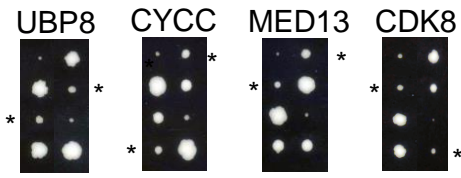

**B**

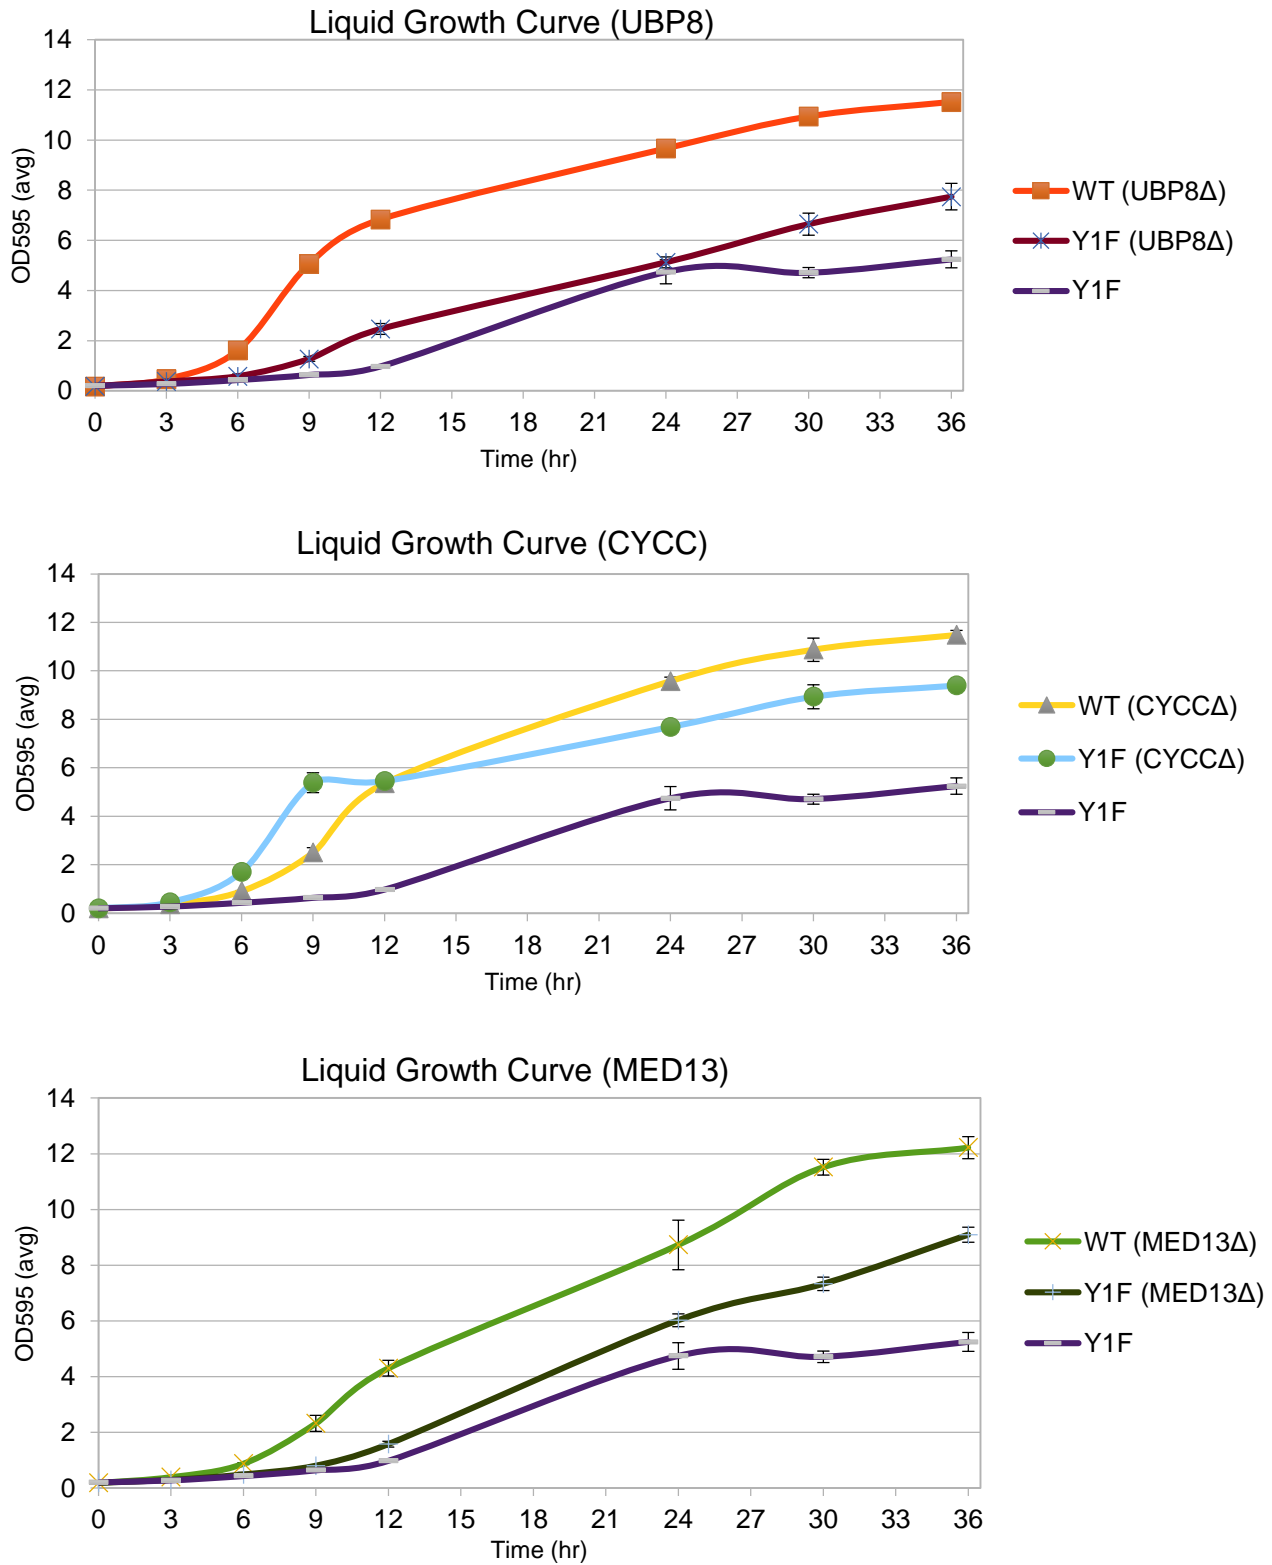

Figure S3

**A**

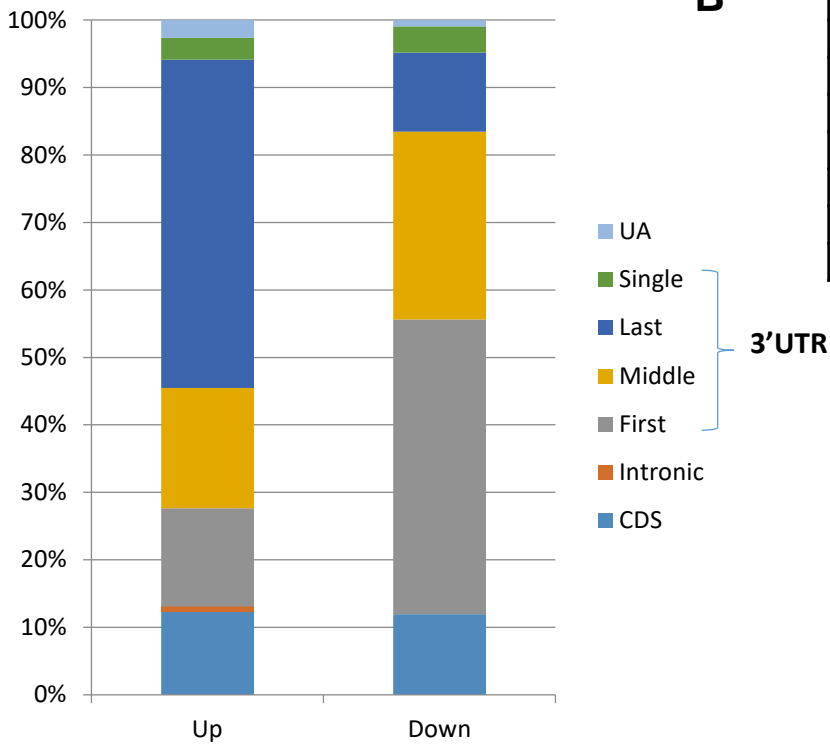

**B**

|          | Up  | Down | No_sign |
|----------|-----|------|---------|
| CDS      | 65  | 52   | 3052    |
| Intronic | 4   | 0    | 23      |
| First    | 77  | 190  | 3089    |
| Middle   | 94  | 121  | 4326    |
| Last     | 257 | 51   | 3048    |
| Single   | 17  | 17   | 325     |
| UA       | 14  | 4    | 951     |

**C**

**Y1F vs WT**

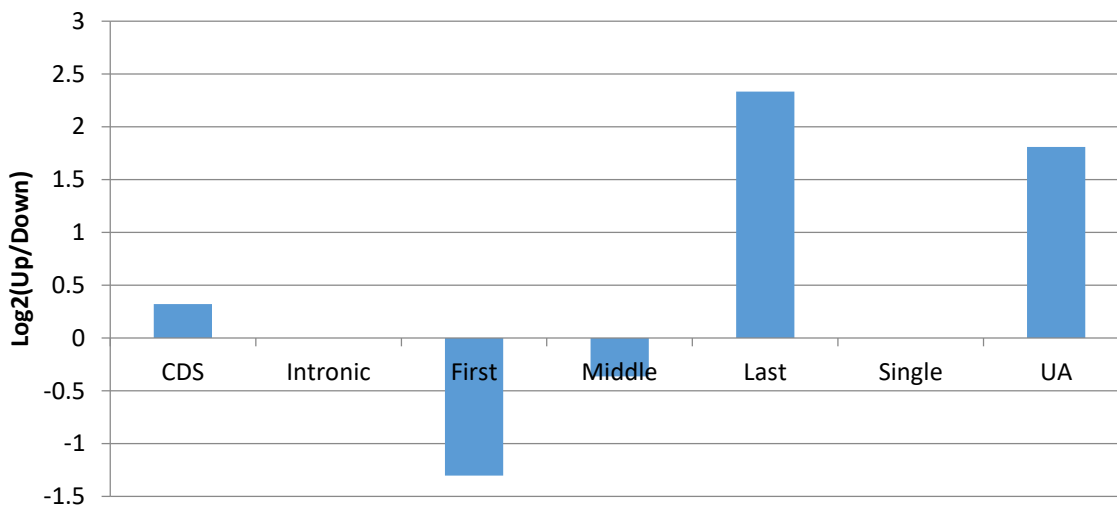

Figure S4

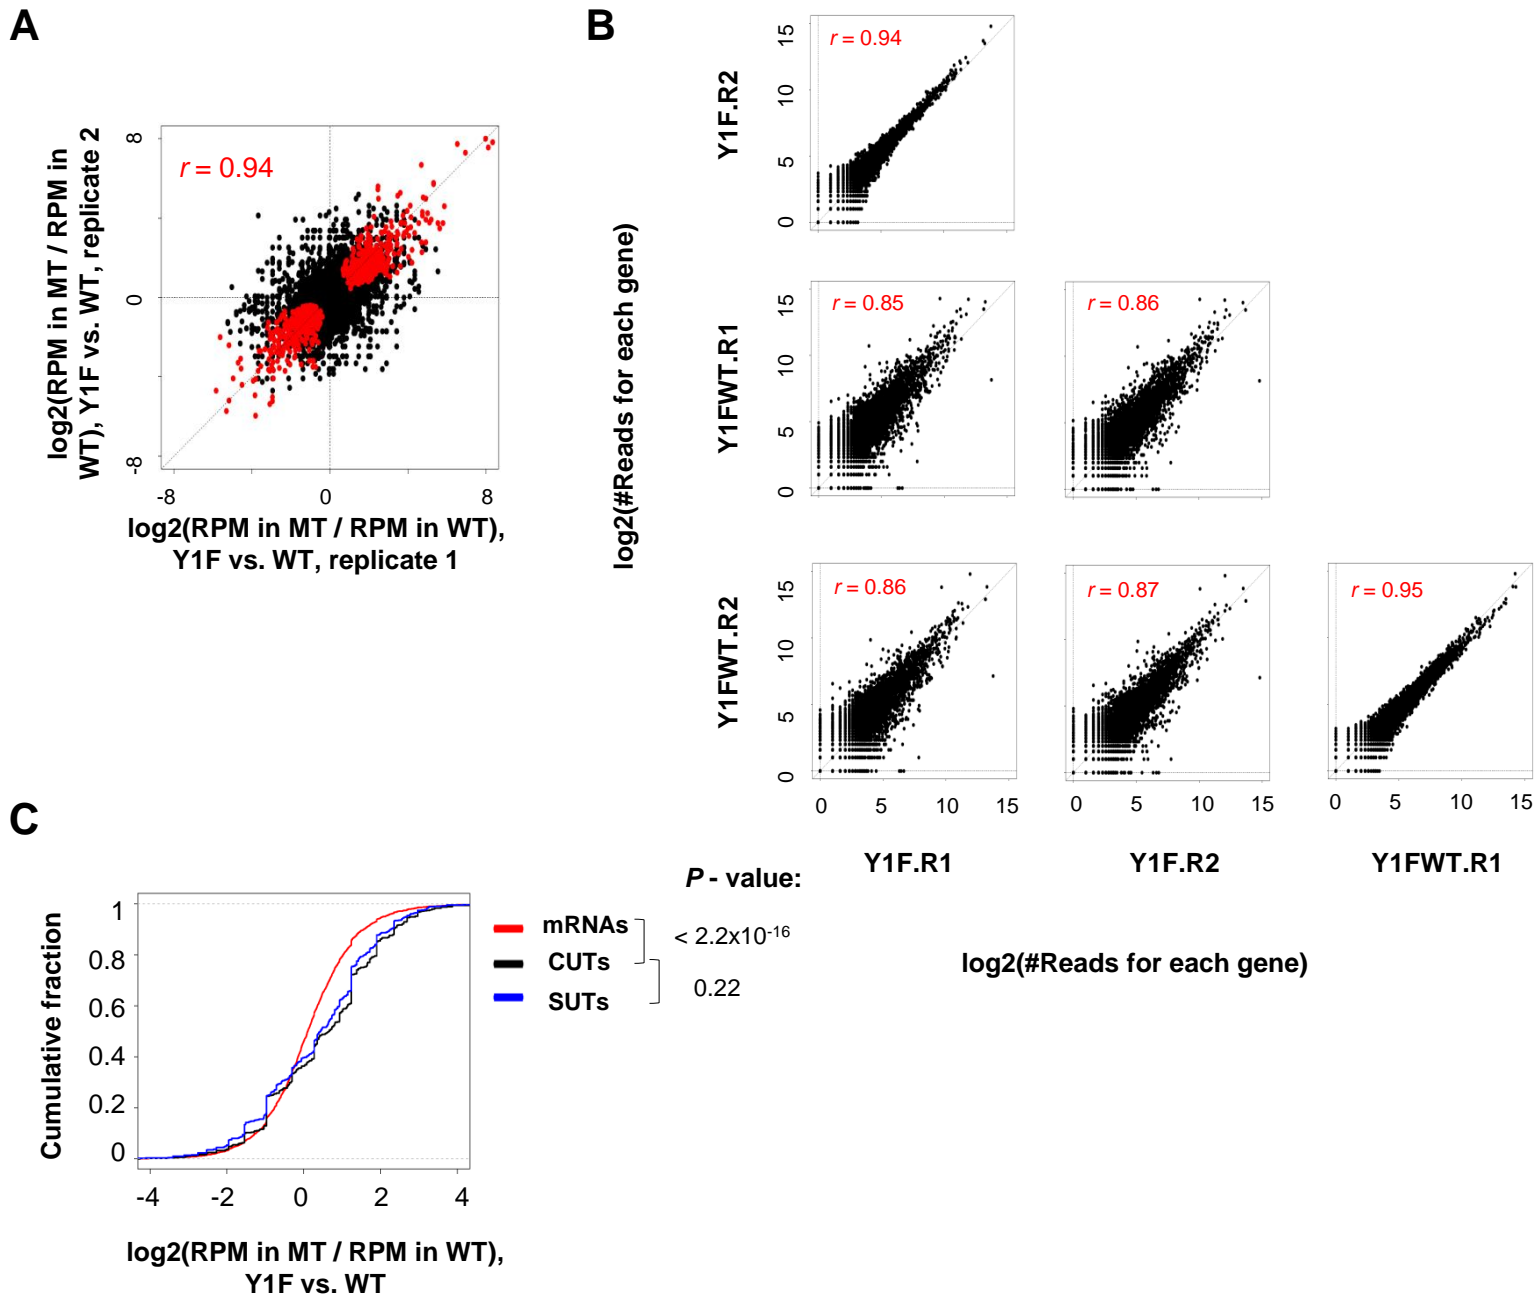

Figure S5

Summary of Tyr1P ChIP intensity in each gene set

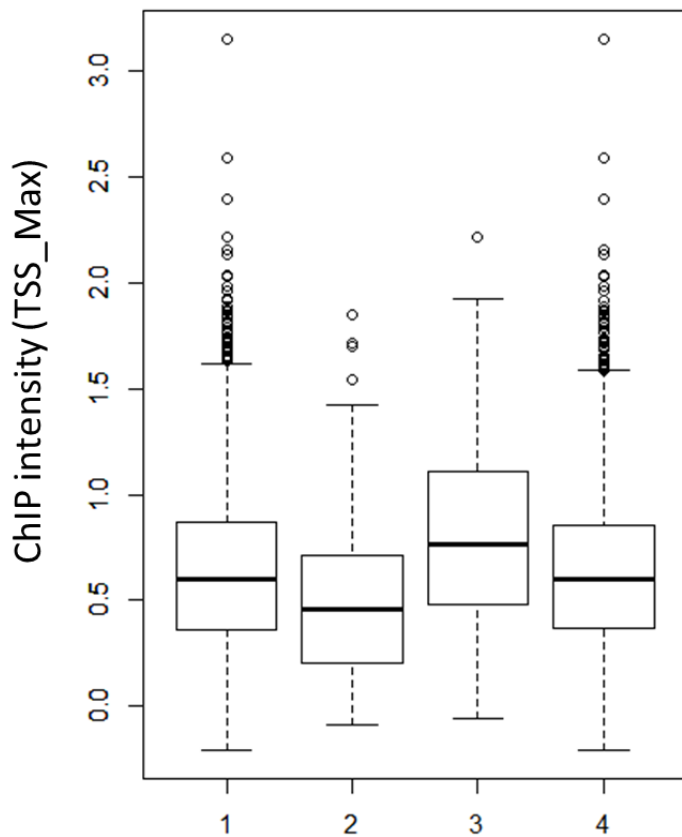

1. All genes (4530)
2. Up-regulated genes (222)
3. Down-regulated genes (276)
4. No-changed genes (4032)

| TSS_Max  | Group1  | Group2   | Group3   | Group4  |
|----------|---------|----------|----------|---------|
| Min. :   | -0.2034 | -0.08644 | -0.05819 | -0.2034 |
| 1st Qu.: | 0.3649  | 0.20549  | 0.48645  | 0.3697  |
| Median : | 0.6005  | 0.45741  | 0.76779  | 0.6000  |
| Mean :   | 0.6332  | 0.48432  | 0.80010  | 0.6300  |
| 3rd Qu.: | 0.8666  | 0.70770  | 1.10623  | 0.8557  |
| Max. :   | 3.1474  | 1.84801  | 2.21684  | 3.1474  |

1. Tyr1P ChIP signal in Up-regulated gene set is weaker than No-changed gene set.  
(Welch two sample t-test, p-value = 4.449e-08)
2. Tyr1P ChIP signal in Down-regulated gene set is stronger than No-changed gene set.  
(Welch two sample t-test, p-value = 6.603e-10)

Figure S6

**A** Summary of normalized Tyr1P/Rpb3 ChIP intensity in each gene set

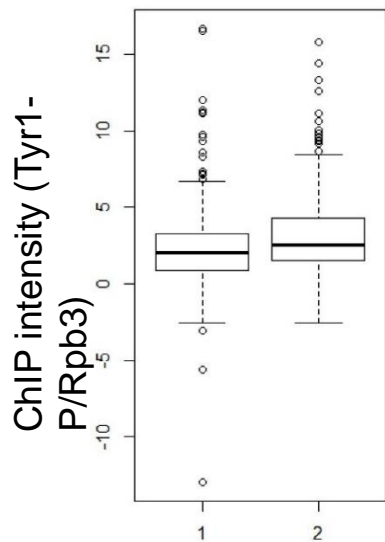

1. Up-regulated genes (217)

2. Down-regulated genes (272)

Extreme values (samples with very low Rpb3-ChIP signal:  $-0.015 < \text{Rpb3} < 0.015$ ) were removed from each gene set.

(5 Up-regulated and 4 Down-regulated genes were discarded.

| Rpb3     | Group1  | Group2 |
|----------|---------|--------|
| Min. :   | -12.980 | -2.546 |
| 1st Qu.: | 0.898   | 1.504  |
| Median : | 2.045   | 2.554  |
| Mean :   | 2.553   | 3.296  |
| 3rd Qu.: | 3.265   | 4.326  |
| Max. :   | 16.721  | 15.795 |

Tyr1P/Rpb3 ChIP signal in the Down-regulated gene set is stronger than in the Up-regulated gene set. (Welch two sample t-test, p-value = 0.004854)

**B** Summary of expression level in each gene set

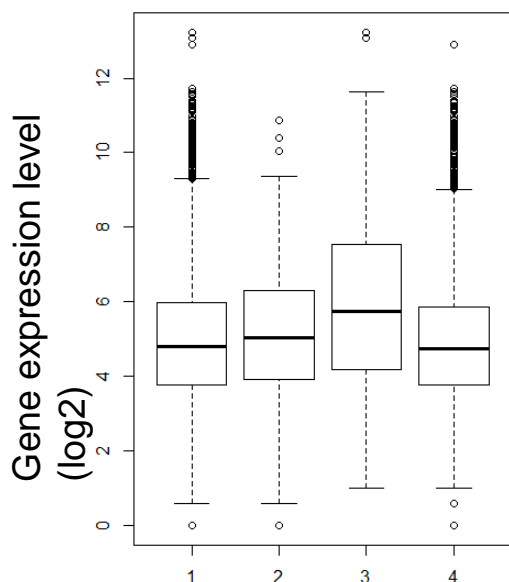

1. All genes (4530)

2. Up-regulated genes (222)

3. Down-regulated genes (276)

4. No-changed genes (4032)

| Exp       | Group1 | Group2 | Group3 | Group4 |
|-----------|--------|--------|--------|--------|
| Min.:     | 0.000  | 0.000  | 1.000  | 0.000  |
| 1st Qu. : | 3.755  | 3.907  | 4.180  | 3.755  |
| Median :  | 4.781  | 5.022  | 5.728  | 4.728  |
| Mean :    | 5.003  | 5.155  | 5.964  | 4.928  |
| 3rd Qu.:  | 5.977  | 6.313  | 7.535  | 5.858  |
| Max. :    | 13.223 | 10.880 | 13.223 | 12.898 |
| NA's :    | 543    | 21     | 30     | 492    |

1, Expression level of Up-regulated gene set is slightly stronger than No-changed gene set.

(Welch two sample t-test, p-value = 0.08967)

2, Expression level of Down-regulated gene set is stronger than No-changed gene set.

(Welch two sample t-test, p-value = 1.534e-10)

Figure S7

72 Hr

**A**

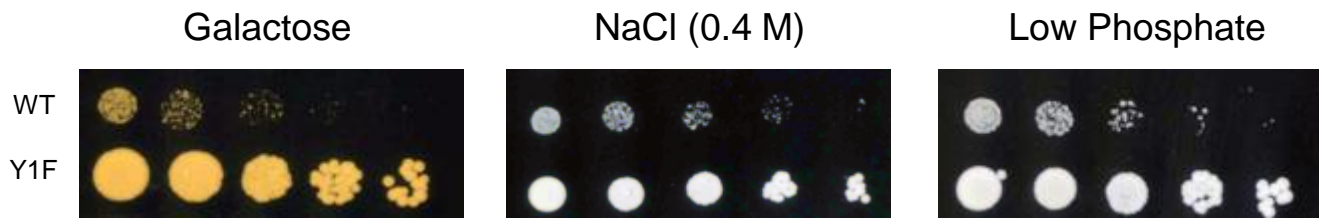

**B**

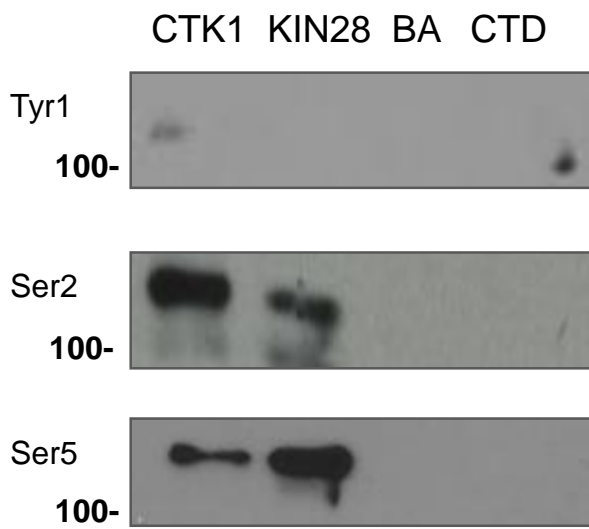

**Table S1**

| <b>Strain</b>                                                       | <b>Genotype</b>                                                                                      |
|---------------------------------------------------------------------|------------------------------------------------------------------------------------------------------|
| BY4741                                                              | MATa his3del1 leu2del0 met15del0 ura3del0                                                            |
| BY4742                                                              | MATalpha his3del1 leu2del0 lys2del0 ura3del0                                                         |
| BY4743                                                              | (Diploid) MATa/MATalpha his3del1/his3del1 leu2del0/leu2del0 lys2del0/+ met15del0/+ ura3del0/ura3del0 |
| <b>The following strains are haploids derived from BY4743</b>       |                                                                                                      |
| NYYM203A                                                            | rpb1::rpb1-CTD(Y1F)26-NatR (Y1F 1)                                                                   |
| NYYM204D                                                            | rpb1::rpb1-CTD(Y1F)26-NatR (Y1F 2)                                                                   |
| NYYM205A                                                            | rpb1::rpb1-CTD(CONS)26-NatR                                                                          |
| NYYM208A                                                            | ygl178cdel::kanMX rpb1::rpb1-CTD(Y1F)26-NatR                                                         |
| NYYM209A                                                            | ygl178cdel::kanMX                                                                                    |
| NYYM210C                                                            | ubp8del::kanMX rpb1::rpb1-CTD(Y1F)26-NatR                                                            |
| NYYM211A                                                            | ubp8del::kanMX                                                                                       |
| NYYM212B                                                            | ssn3del::kanMX rpb1::rpb1-CTD(Y1F)26-NatR                                                            |
| NYYM213A                                                            | ssn3del::kanMX                                                                                       |
| NYYM214A                                                            | ssn8del::kanMX rpb1::rpb1-CTD(Y1F)26-NatR                                                            |
| NYYM215A                                                            | ssn8del::kanMX                                                                                       |
| NYYM216B                                                            | ssn2del::kanMX rpb1::rpb1-CTD(Y1F)26-NatR                                                            |
| NYYM217A                                                            | ssn2del::kanMX                                                                                       |
| NYYM218D                                                            | SSN8::3HA HIS3+ rpb1::rpb1-CTD(Y1F)26-NatR                                                           |
| NYYM219A                                                            | SSN8::3HA HIS3+                                                                                      |
| NYYM220B                                                            | SSN3::3HA HIS3+ rpb1::rpb1-CTD(Y1F)26-NatR                                                           |
| NYYM221A                                                            | SSN3::3HA HIS3+                                                                                      |
| NYYM222A                                                            | SLT2::3HA HIS3+ rpb1::rpb1-CTD(Y1F)26-NatR                                                           |
| NYYM223A                                                            | SLT2::3HA HIS3+                                                                                      |
| NYYM224A                                                            | slt2del::kanMX                                                                                       |
| NYYM225C                                                            | slt2del::kanMX [pRS315-slt2(K54R)-3HA] LEU2+                                                         |
| NYYM226A                                                            | HOG1::3HA HIS3+                                                                                      |
| NYYM227A                                                            | CTK1::3HA HIS3+                                                                                      |
| NYYM228A                                                            | KIN28::3HA HIS3+                                                                                     |
| NYYM229A                                                            | hog1del::kanMX                                                                                       |
| NYYM230A                                                            | slt2del::kanMX hog1del::NatR                                                                         |
| NYYM231C                                                            | NRD1::3HA HIS3+ rpb1::rpb1-CTD(Y1F)26-NatR                                                           |
| NYYM232A                                                            | NRD1::3HA HIS3+                                                                                      |
| NYYM233B                                                            | RTT103::3HA HIS3+ rpb1::rpb1-CTD(Y1F)26-NatR                                                         |
| NYYM234A                                                            | RTT103::3HA HIS3+                                                                                    |
| <b>The following strains were derived from the S288C background</b> |                                                                                                      |
| Y7092                                                               | can1del::STE2pr-SpHis5 his3del1 leu2del0 ura3del0 met15del0 lyp1del LYS2+                            |
| NYYM206A                                                            | rpb1::rpb1-CTD(Y1F)26-NatR [pADH::RPB1/URA3]                                                         |
| NYYM207A                                                            | rpb1::rpb1-CTD(CONS)26-NatR [pADH::RPB1/URA3]                                                        |



## SUPPLEMENTARY FIGURE LEGENDS

**Figure S1: Tetrad dissection and liquid growth of WT and Y1F strains.** Related to Figure 1. **(A)** Tetrad dissection of heterozygous diploid Y1F CTD strain (Y1F). Y1F CTD in haploid tetrads was marked with NAT resistance and was present in all small-size tetrads. **(B)** Liquid growth curve for WT and Y1F strains in rich medium over 48 hours. Results are averages of three biological replicates for each strain.

**Figure S2: Tetrad dissection and liquid growth of SGA suppressor-containing strains.** Related to Figure 2. **(A)** Sample tetrad dissection results for SGA genes *UBP8*, *CYCC*, *MED13*, and *CDK8*. Asterisk (\*) indicates NAT-/G418-resistant double mutant containing both gene deletion (G418 resistance) and Y1F polymerase (NAT resistance). **(B)** Liquid growth curve for suppressors of Y1F strains (*UBP8*, *CYCC*, *MED13*) in rich medium over 48 hours (growth of Y1F from Figure S1B is shown for comparison). Results are averages of three biological replicates for each strain.

**Figure S3: Analysis of poly(A) site usage in WT and Y1F strains by 3'READS.** Related to Figure 3. **(A)** Up- and down-regulation of poly(A) site usage in Y1F strain compared to WT. Labels "First" through "Single" are found in 3' UTR of genes. **(B)** Number of poly(A) site changes from (A) in table. **(C)** Log<sub>2</sub> values for ratio of up-/down-regulated poly(A) sites in Y1F vs. WT.

**Figure S4: Correlation data for RNA sequencing analysis.** Related to Figure 3. **(A)** Correlation of significant genes (up-regulated/down-regulated) between WT and Y1F replicates. **(B)** Correlation for number of reads of genes in samples. **(C)** Analysis of CUT and SUT expression changes between WT and Y1F.

**Figure S5: Comparison of P-Tyr1 ChIP microarray data with RNA transcript levels in Y1F vs WT strains.** Related to Figure 3. Tyr1P ChIP signal intensities from Mayer et al. (2012) on up- and down-regulated genes, and genes with no expression changes in Y1F compared to WT cells were determined.

**Figure S6: Comparison of P-Tyr1 ChIP microarray data with RNA polymerase II levels in Y1F vs WT strains.** Related to Figure 3. **(A)** Tyr1P ChIP signal intensities from Mayer et al. (2012), normalized to Rpb3 levels from Mayer et al. (2010), on up- and down-regulated genes in Y1F compared to WT cells were determined. **(B)** Expression levels in WT yeast, determined by RNA-seq data from Nagalakshmi et al. (2008), of up-regulated, down-regulated, and genes with no expression changes in Y1F cells, as analyzed in Figures S5 and S6A.

**Figure S7: Effects of additional stresses on Y1F growth and in vitro kinase assays with Ctk1 and Kin28.** Related to Figure 4. **(A)** Media containing galactose as the sole carbon source, or 0.4 M NaCl, or media depleted of phosphate were used to determine Y1F and WT growth compared to rich media at the indicated time points. **(B)** Both 3HA-tagged kinases were extracted from yeast and following IP incubated with GST-CTD as in Figure 4. Blots with Tyr1p- (3D12), Ser2p- (3E10), and Ser5p- (3E8) antibodies are shown. Lanes are Ctk1-HA (CTK1), Kin28-HA (KIN28), beads and antibody control (BA), and GST-CTD alone (CTD).

## **SUPPLEMENTARY TABLES**

**Table S1:** List of strains used for this study. Related to STAR\*METHODS.

**Table S2:** Full list of suppressor mutants from the Y1F suppressor SGA. Related to Figure 2. See STAR\*METHODS for Mendeley database link.

**Table S3:** Complete results from Y1F RNA sequencing analysis (separated by tabs).

Related to Figure 3. See STAR\*METHODS for Mendeley database link
